# Supplementary material
Source: PubMed Central journal article supplement (PMC3132937)
Supplement: NIHMS297442-supplement-supplement_1.pdf [file NIHMS297442-supplement-supplement_1.pdf]

**eTable 1 Prenatal and Perinatal Factors Examined**

| <b>Study samples</b>                     | <b>Variables</b>                                                                                                                                                                                                                                                                                                                                                                                                                                                                                                                                                                                                                                                                                                                                                                                                                                                                                                                         |
|------------------------------------------|------------------------------------------------------------------------------------------------------------------------------------------------------------------------------------------------------------------------------------------------------------------------------------------------------------------------------------------------------------------------------------------------------------------------------------------------------------------------------------------------------------------------------------------------------------------------------------------------------------------------------------------------------------------------------------------------------------------------------------------------------------------------------------------------------------------------------------------------------------------------------------------------------------------------------------------|
| NHS and NHS-II full cohorts <sup>a</sup> | Birthweight (<5.5, 5.5-6.9, 7-8.4, 8.5-9.9, 10+ lbs) <sup>b</sup> , season of birth, multiple birth <sup>b</sup> , preterm vs. term birth <sup>b</sup> , maternal smoking during pregnancy <sup>b</sup> , parental smoking at home during childhood                                                                                                                                                                                                                                                                                                                                                                                                                                                                                                                                                                                                                                                                                      |
| NHS full cohort only <sup>a</sup>        | Maternal age at birth, paternal age at birth, paternal smoking during the year of the nurses' pregnancy                                                                                                                                                                                                                                                                                                                                                                                                                                                                                                                                                                                                                                                                                                                                                                                                                                  |
| NHS-II full cohort only <sup>a</sup>     | In utero DES exposure <sup>b</sup>                                                                                                                                                                                                                                                                                                                                                                                                                                                                                                                                                                                                                                                                                                                                                                                                                                                                                                       |
| Nurses' Mothers Cohort only <sup>c</sup> | Maternal prepregnancy BMI, paternal education level at birth, paternal occupation in infancy/childhood, maternal education at birth, maternal occupation in infancy/childhood, mother born in the US, father born in the US, parents cohabitating at birth, parents owned a home at the time of birth, unsuccessful attempts at pregnancy for >1 year, previous miscarriage(s), previous stillbirth(s), mother working during pregnancy, maternal physical activity level during pregnancy (at home, work, recreationally), manual labor during pregnancy, cesarean delivery, forceps delivery, birth length, maternal medical conditions during pregnancy: anemia, pregnancy-induced hypertension, preeclampsia/toxemia, proteinuria, infections during pregnancy, morning sickness, weight gain during pregnancy, hospitalization during pregnancy, nausea medication use, sleep medication use, timing of initiation of prenatal care |

<sup>a</sup> Self-reported exposures

<sup>b</sup> Also available by maternal report in the nurses' mothers cohort. However, for these variables the exposure was classified by the nurses' self-report.

<sup>c</sup> Maternal-reported exposures

**eTable 2: Components of the Obstetric Suboptimality Score**

| <b>Variables (1 point for each positive response)</b> |                             |
|-------------------------------------------------------|-----------------------------|
| Maternal age <20 or >30y                              |                             |
| Low birthweight                                       |                             |
| Born 2+ wk early                                      |                             |
| Twin pregnancy                                        |                             |
| No prenatal health care                               |                             |
| Cesarian delivery                                     |                             |
| Forceps use                                           |                             |
| Severe nausea                                         |                             |
| Sleep medication use                                  |                             |
| Nausea medication use                                 |                             |
| DES exposure                                          |                             |
| Maternal anemia                                       |                             |
| Maternal diabetes during pregnancy                    |                             |
| High blood pressure                                   |                             |
| Preeclampsia or eclampsia                             |                             |
| Proteinuria                                           |                             |
| Maternal infection                                    |                             |
| Hospitalization during pregnancy                      |                             |
| Maternal cigarette smoking during pregnancy           |                             |
| Prior stillbirth                                      |                             |
| Prior miscarriage                                     |                             |
| Maternal history of infertility                       |                             |
| <b>Total Possible Points = 22</b>                     |                             |
| <b>OSS Distribution in the NHS-II</b>                 |                             |
| <b><u>Score</u></b>                                   | <b><u>Frequency (%)</u></b> |
| 0                                                     | 5585 (16%)                  |
| 1                                                     | 10506 (29%)                 |
| 2                                                     | 9377 (27%)                  |
| 3                                                     | 5688 (16%)                  |
| 4                                                     | 2718 (8%)                   |
| 5                                                     | 1161 (3%)                   |
| 6                                                     | 499 (1%)                    |
| 7                                                     | 196 (<1%)                   |
| 8                                                     | 62 (<1%)                    |
| 9                                                     | 24 (<1%)                    |
| 10                                                    | 4 (<1%)                     |
| 11                                                    | 5 (<1%)                     |
| 12                                                    | 1 (<1%)                     |

**Table 3: Prenatal and Perinatal Factors and Risk of MS in the Nurses' Mothers' Subcohort**

| Variable                                                    | # Participants <sup>a</sup> | # Cases <sup>a</sup><br>(incident and prevalent <sup>b</sup> ) | Multivariate-adjusted <sup>c</sup> Rate Ratio (95% CI): Incident cases and prevalent cases | Multivariate-adjusted <sup>c</sup> Rate Ratio (95% CI): Incident cases only |
|-------------------------------------------------------------|-----------------------------|----------------------------------------------------------------|--------------------------------------------------------------------------------------------|-----------------------------------------------------------------------------|
| <b>Parental factors</b>                                     |                             |                                                                |                                                                                            |                                                                             |
| <b>Maternal pre-pregnancy BMI</b>                           |                             |                                                                |                                                                                            |                                                                             |
| <18.5 kg/m <sup>2</sup>                                     | 3568                        | 7                                                              | 0.39 (0.18-0.83)                                                                           | 0.43 (0.19-0.98)                                                            |
| 18.5-24.9 kg/m <sup>2</sup>                                 | 27317                       | 149                                                            | 1.0                                                                                        | 1.0                                                                         |
| 25+ kg/m <sup>2</sup>                                       | 2404                        | 20                                                             | 1.67 (1.04-2.69)                                                                           | 1.56 (0.89-2.74)                                                            |
| P for trend                                                 |                             |                                                                | 0.001                                                                                      | 0.003                                                                       |
| <b>Paternal education at birth<sup>d</sup></b>              |                             |                                                                |                                                                                            |                                                                             |
| <4 yrs high school                                          | 6339                        | 32                                                             | 0.89 (0.59-1.36)                                                                           | 0.85 (0.52-1.39)                                                            |
| High school grad                                            | 13142                       | 70                                                             | 1.0                                                                                        | 1.0                                                                         |
| College                                                     | 14756                       | 72                                                             | 0.99 (0.62-1.57)                                                                           | 0.82 (0.55-1.22)                                                            |
| <b>Paternal occupation in infancy/childhood</b>             |                             |                                                                |                                                                                            |                                                                             |
| Professional or managerial                                  | 10276                       | 58                                                             | 1.23 (0.89-1.69)                                                                           | 1.23 (0.84-1.79)                                                            |
| Other                                                       | 23109                       | 113                                                            | 1.0                                                                                        | 1.0                                                                         |
| <b>Maternal education at birth</b>                          |                             |                                                                |                                                                                            |                                                                             |
| <4 yrs high school                                          | 4802                        | 24                                                             | 0.70 (0.22-2.25)                                                                           | 1.08 (0.66-1.76)                                                            |
| High school grad                                            | 16518                       | 95                                                             | 1.0                                                                                        | 1.0                                                                         |
| College                                                     | 13037                       | 63                                                             | 1.00 (0.42-2.38)                                                                           | 0.66 (0.44-1.00)                                                            |
| <b>Maternal occupation in infancy/childhood<sup>d</sup></b> |                             |                                                                |                                                                                            |                                                                             |
| Professional or managerial                                  | 3461                        | 18                                                             | 1.07 (0.66-1.75)                                                                           | 0.97 (0.53-1.76)                                                            |
| Other                                                       | 32150                       | 165                                                            | 1.0                                                                                        | 1.0                                                                         |
| <b>Father born in the US</b>                                |                             |                                                                |                                                                                            |                                                                             |
| Yes                                                         | 33813                       | 173                                                            | 1.0                                                                                        | 1.0                                                                         |
| No                                                          | 1763                        | 10                                                             | 1.40 (0.29-6.75)                                                                           | 0.62 (0.22-1.69)                                                            |

| Variable                                                                       | # Participants <sup>a</sup> | # Cases <sup>a</sup><br>(incident and prevalent <sup>b</sup> ) | Multivariate-adjusted <sup>c</sup> Rate Ratio (95% CI): Incident cases and prevalent cases | Multivariate-adjusted <sup>c</sup> Rate Ratio (95% CI): Incident cases only |
|--------------------------------------------------------------------------------|-----------------------------|----------------------------------------------------------------|--------------------------------------------------------------------------------------------|-----------------------------------------------------------------------------|
| <b>Mother born in the US</b>                                                   |                             |                                                                |                                                                                            |                                                                             |
| Yes                                                                            | 32820                       | 174                                                            | 1.0                                                                                        | 1.0                                                                         |
| No                                                                             | 1833                        | 10                                                             | 1.28 (0.38-4.34)                                                                           | 0.69 (0.28-1.73)                                                            |
| <b>Parents living together at birth</b>                                        |                             |                                                                |                                                                                            |                                                                             |
| Yes                                                                            | 34483                       | 179                                                            | 1.0                                                                                        | 1.0                                                                         |
| No                                                                             | 422                         | 5                                                              | 3.95 (1.01-15.37)                                                                          | 3.95 (1.01-15.37)                                                           |
| <b>Owned a home at time of birth</b>                                           |                             |                                                                |                                                                                            |                                                                             |
| Yes                                                                            | 16820                       | 85                                                             | 1.08 (0.65-1.80)                                                                           | 0.87 (0.61-1.23)                                                            |
| No                                                                             | 15578                       | 98                                                             | 1.0                                                                                        | 1.0                                                                         |
| <b>Obstetrical history</b>                                                     |                             |                                                                |                                                                                            |                                                                             |
| <b>Unsuccessful attempts at pregnancy for &gt;1 year</b>                       |                             |                                                                |                                                                                            |                                                                             |
| Yes                                                                            | 3990                        | 17                                                             | 0.75 (0.45-1.25)                                                                           | 0.77 (0.43-1.39)                                                            |
| No                                                                             | 29514                       | 166                                                            | 1.0                                                                                        | 1.0                                                                         |
| <b>Previous miscarriage</b>                                                    |                             |                                                                |                                                                                            |                                                                             |
| Yes                                                                            | 12410                       | 68                                                             | 1.08 (0.79-1.49)                                                                           | 1.20 (0.84-1.71)                                                            |
| No                                                                             | 23051                       | 115                                                            | 1.0                                                                                        | 1.0                                                                         |
| <b>2+ previous miscarriages</b>                                                |                             |                                                                |                                                                                            |                                                                             |
| Yes                                                                            | 4252                        | 17                                                             | 0.74 (0.45-1.22)                                                                           | 0.83 (0.47-1.45)                                                            |
| No                                                                             | 31171                       | 166                                                            | 1.0                                                                                        | 1.0                                                                         |
| <b>Previous stillbirth</b>                                                     |                             |                                                                |                                                                                            |                                                                             |
| Yes                                                                            | 1432                        | 10                                                             | 1.39 (0.73-2.63)                                                                           | 1.36 (0.63-2.93)                                                            |
| No                                                                             | 34432                       | 174                                                            | 1.0                                                                                        | 1.0                                                                         |
| <b>Maternal medical conditions and healthcare utilization during pregnancy</b> |                             |                                                                |                                                                                            |                                                                             |
| <b>Anemia</b>                                                                  |                             |                                                                |                                                                                            |                                                                             |
| Yes                                                                            | 3652                        | 14                                                             | 0.77 (0.44-1.33)                                                                           | 0.84 (0.45-1.56)                                                            |

| <b>Variable</b>                           | <b># Participants<sup>a</sup></b> | <b># Cases<sup>a</sup><br/>(incident and<br/>prevalent<sup>b</sup>)</b> | <b>Multivariate-adjusted<sup>c</sup> Rate<br/>Ratio (95% CI): Incident<br/>cases and prevalent cases</b> | <b>Multivariate-adjusted<sup>c</sup><br/>Rate Ratio (95% CI):<br/>Incident cases only</b> |
|-------------------------------------------|-----------------------------------|-------------------------------------------------------------------------|----------------------------------------------------------------------------------------------------------|-------------------------------------------------------------------------------------------|
| No                                        | 31168                             | 165                                                                     | 1.0                                                                                                      | 1.0                                                                                       |
| <b>Diabetes during pregnancy</b>          |                                   |                                                                         |                                                                                                          |                                                                                           |
| Yes                                       | 158                               | 2                                                                       | 10.19 (2.47-42.07)                                                                                       | Not estimable (no cases)                                                                  |
| No                                        | 33839                             | 173                                                                     | 1.0                                                                                                      |                                                                                           |
| <b>Pregnancy-induced<br/>hypertension</b> |                                   |                                                                         |                                                                                                          |                                                                                           |
| Yes                                       | 1274                              | 8                                                                       | 1.30 (0.64-2.67)                                                                                         | 1.48 (0.68-3.18)                                                                          |
| No                                        | 33246                             | 169                                                                     | 1.0                                                                                                      | 1.0                                                                                       |
| <b>Preeclampsia/toxemia</b>               |                                   |                                                                         |                                                                                                          |                                                                                           |
| Yes                                       | 1212                              | 9                                                                       | 1.46 (0.73-2.92)                                                                                         | 1.65 (0.79-3.44)                                                                          |
| No                                        | 33319                             | 167                                                                     | 1.0                                                                                                      | 1.0                                                                                       |
| <b>Proteinuria</b>                        |                                   |                                                                         |                                                                                                          |                                                                                           |
| Yes                                       | 580                               | 4                                                                       | 1.99 (0.73-5.43)                                                                                         | 1.98 (0.73-5.43)                                                                          |
| No                                        | 33701                             | 172                                                                     | 1.0                                                                                                      | 1.0                                                                                       |
| <b>Infection during pregnancy</b>         |                                   |                                                                         |                                                                                                          |                                                                                           |
| Yes                                       | 886                               | 6                                                                       | 1.48 (0.65-3.36)                                                                                         | 1.66 (0.67-4.10)                                                                          |
| No                                        | 33494                             | 171                                                                     | 1.0                                                                                                      | 1.0                                                                                       |
| <b>Immune-related factors<sup>c</sup></b> |                                   |                                                                         |                                                                                                          |                                                                                           |
| 0                                         | 32719                             | 162                                                                     | 1.0                                                                                                      | 1.0                                                                                       |
| 1+                                        | 2003                              | 16                                                                      | 1.49 (0.69-3.20)                                                                                         | 1.86 (1.05-3.28)                                                                          |
| <b>Morning sickness</b>                   |                                   |                                                                         |                                                                                                          |                                                                                           |
| Yes                                       | 23861                             | 131                                                                     | 1.27 (0.92-1.76)                                                                                         | 1.37 (0.93-2.02)                                                                          |
| No                                        | 11774                             | 51                                                                      | 1.0                                                                                                      | 1.0                                                                                       |
| <b>Weight gain during pregnancy</b>       |                                   |                                                                         |                                                                                                          |                                                                                           |
| <15 lbs                                   | 4833                              | 37                                                                      | 1.67 (1.04-2.68)                                                                                         | 1.40 (0.88-2.22)                                                                          |
| 15-29 lbs                                 | 20650                             | 95                                                                      | 1.0                                                                                                      | 1.0                                                                                       |

| <b>Variable</b>                           | <b># Participants<sup>a</sup></b> | <b># Cases<sup>a</sup><br/>(incident and<br/>prevalent<sup>b</sup>)</b> | <b>Multivariate-adjusted<sup>c</sup> Rate<br/>Ratio (95% CI): Incident<br/>cases and prevalent cases</b> | <b>Multivariate-adjusted<sup>c</sup><br/>Rate Ratio (95% CI):<br/>Incident cases only</b> |
|-------------------------------------------|-----------------------------------|-------------------------------------------------------------------------|----------------------------------------------------------------------------------------------------------|-------------------------------------------------------------------------------------------|
| 30+ lbs                                   | 7455                              | 42                                                                      | 1.21 (0.84-1.74)                                                                                         | 1.16 (0.76-1.77)                                                                          |
| P for trend                               |                                   |                                                                         | 0.53                                                                                                     | 0.74                                                                                      |
| <b>Hospitalized during pregnancy</b>      |                                   |                                                                         |                                                                                                          |                                                                                           |
| Yes                                       | 1463                              | 7                                                                       | 1.04 (0.48-2.22)                                                                                         | 0.78 (0.29-2.12)                                                                          |
| No                                        | 34189                             | 174                                                                     | 1.0                                                                                                      | 1.0                                                                                       |
| <b>Medication use in pregnancy</b>        |                                   |                                                                         |                                                                                                          |                                                                                           |
| Yes                                       | 4420                              | 24                                                                      | 1.21 (0.57-2.57)                                                                                         | 0.84 (0.48-1.48)                                                                          |
| No                                        | 29543                             | 152                                                                     | 1.0                                                                                                      | 1.0                                                                                       |
| <b>Nausea medication use</b>              |                                   |                                                                         |                                                                                                          |                                                                                           |
| Yes                                       | 3552                              | 18                                                                      | 1.17 (0.53-2.55)                                                                                         | 0.80 (0.42-1.53)                                                                          |
| No                                        | 31402                             | 162                                                                     | 1.0                                                                                                      | 1.0                                                                                       |
| <b>Sleep medication use</b>               |                                   |                                                                         |                                                                                                          |                                                                                           |
| Yes                                       | 198                               | 4                                                                       | 3.99 (0.42-37.48)                                                                                        | 1.09 (0.15-7.95)                                                                          |
| No                                        | 34139                             | 175                                                                     | 1.0                                                                                                      | 1.0                                                                                       |
| <b>DES use</b>                            |                                   |                                                                         |                                                                                                          |                                                                                           |
| Yes                                       | 928                               | 6                                                                       | 1.13 (0.50-2.57)                                                                                         | 1.24 (0.50-3.06)                                                                          |
| No                                        | 31715                             | 166                                                                     | 1.0                                                                                                      | 1.0                                                                                       |
| <b>Prenatal care</b>                      |                                   |                                                                         |                                                                                                          |                                                                                           |
| None or after 1 <sup>st</sup> tri         | 3699                              | 27                                                                      | 1.55 (1.02-2.35)                                                                                         | 1.63 (1.00-2.85)                                                                          |
| 1 <sup>st</sup> trimester                 | 30895                             | 149                                                                     | 1.0                                                                                                      | 1.0                                                                                       |
| <b>Maternal activity during pregnancy</b> |                                   |                                                                         |                                                                                                          |                                                                                           |
| <b>Mother worked during pregnancy</b>     |                                   |                                                                         |                                                                                                          |                                                                                           |
| Yes                                       | 11743                             | 53                                                                      | 0.81 (0.58-1.12)                                                                                         | 0.76 (0.51-1.12)                                                                          |
| No                                        | 23868                             | 130                                                                     | 1.0                                                                                                      | 1.0                                                                                       |
| <b>Physically active during</b>           |                                   |                                                                         |                                                                                                          |                                                                                           |

| <b>Variable</b>                                                   | <b># Participants<sup>a</sup></b> | <b># Cases<sup>a</sup><br/>(incident and<br/>prevalent<sup>b</sup>)</b> | <b>Multivariate-adjusted<sup>c</sup> Rate<br/>Ratio (95% CI): Incident<br/>cases and prevalent cases</b> | <b>Multivariate-adjusted<sup>c</sup><br/>Rate Ratio (95% CI):<br/>Incident cases only</b> |
|-------------------------------------------------------------------|-----------------------------------|-------------------------------------------------------------------------|----------------------------------------------------------------------------------------------------------|-------------------------------------------------------------------------------------------|
| <b>pregnancy at home, work, or<br/>recreationally<sup>f</sup></b> |                                   |                                                                         |                                                                                                          |                                                                                           |
| Yes                                                               | 33014                             | 166                                                                     | 1.0                                                                                                      | 1.0                                                                                       |
| No                                                                | 2632                              | 15                                                                      | 1.12 (0.66-1.91)                                                                                         | 1.14 (0.61-2.12)                                                                          |
| <b>Activity level during<br/>pregnancy<sup>g</sup></b>            |                                   |                                                                         |                                                                                                          |                                                                                           |
| Low activity                                                      | 10715                             | 61                                                                      | 1.17 (0.83-1.65)                                                                                         | 1.17 (0.79-1.72)                                                                          |
| Moderately active                                                 | 12497                             | 71                                                                      | 1.0                                                                                                      | 1.0                                                                                       |
| High activity                                                     | 10670                             | 51                                                                      | 1.11 (0.49-2.51)                                                                                         | 0.76 (0.49-1.19)                                                                          |
| P for trend                                                       |                                   |                                                                         | 0.98                                                                                                     | 0.05                                                                                      |
| <b>Manual labor at home or work<br/>during pregnancy</b>          |                                   |                                                                         |                                                                                                          |                                                                                           |
| Yes                                                               | 1685                              | 6                                                                       | 0.69 (0.30-1.56)                                                                                         | 0.62 (0.22-1.69)                                                                          |
| No                                                                | 33349                             | 170                                                                     | 1.0                                                                                                      | 1.0                                                                                       |
| <b>Perinatal factors</b>                                          |                                   |                                                                         |                                                                                                          |                                                                                           |
| <b>Cesarean delivery</b>                                          |                                   |                                                                         |                                                                                                          |                                                                                           |
| Yes                                                               | 1179                              | 3                                                                       | 0.67 (0.21-2.12)                                                                                         | 0.67 (0.21-2.12)                                                                          |
| No                                                                | 33571                             | 180                                                                     | 1.0                                                                                                      | 1.0                                                                                       |
| <b>Forceps delivery</b>                                           |                                   |                                                                         |                                                                                                          |                                                                                           |
| Yes                                                               | 7298                              | 43                                                                      | 1.09 (0.76-1.56)                                                                                         | 1.15 (0.76-1.74)                                                                          |
| No                                                                | 20463                             | 108                                                                     | 1.0                                                                                                      | 1.0                                                                                       |
| <b>Birth length</b>                                               |                                   |                                                                         |                                                                                                          |                                                                                           |
| <18 inches                                                        | 688                               | 5                                                                       | 1.62 (0.66-3.99)                                                                                         | 1.77 (0.65-4.88)                                                                          |
| 19-22 inches                                                      | 24943                             | 123                                                                     | 1.0                                                                                                      | 1.0                                                                                       |
| 23+ inches                                                        | 296                               | 1                                                                       | 0.91 (0.13-6.59)                                                                                         | 0.91 (0.13-6.59)                                                                          |
| P for trend                                                       |                                   |                                                                         | 0.55                                                                                                     | 0.57                                                                                      |

| Variable               | # Participants <sup>a</sup> | # Cases <sup>a</sup><br>(incident and prevalent <sup>b</sup> ) | Multivariate-adjusted <sup>c</sup> Rate Ratio (95% CI): Incident cases and prevalent cases | Multivariate-adjusted <sup>c</sup> Rate Ratio (95% CI): Incident cases only |
|------------------------|-----------------------------|----------------------------------------------------------------|--------------------------------------------------------------------------------------------|-----------------------------------------------------------------------------|
| <b>Composite Score</b> |                             |                                                                |                                                                                            |                                                                             |
| <b>OSS</b>             |                             |                                                                |                                                                                            |                                                                             |
| 0-1                    | 16112                       | 81                                                             | 1.0                                                                                        | 1.0                                                                         |
| 2                      | 9385                        | 46                                                             | 0.92 (0.64-1.32)                                                                           | 0.97 (0.63-1.49)                                                            |
| 3+                     | 10367                       | 57                                                             | 1.06 (0.75-1.50)                                                                           | 1.14 (0.76-1.71)                                                            |
| P for trend            |                             |                                                                | 0.44                                                                                       | 0.49                                                                        |

<sup>a</sup> For each factor, the number of cases and participants may not add up to the total number in the study due to missing exposure values

<sup>b</sup> Incident cases are those diagnosed after cohort recruitment (1989-2003), prevalent cases are the cases diagnosed after age 19 and before cohort recruitment in 1989

<sup>c</sup> Controlling for age in months, calendar year, latitude at birth, SES (paternal occupation), sibship size, pack-years of smoking in adulthood, quintile of vitamin D intake

<sup>d</sup> Analysis not adjusted for paternal occupation

<sup>e</sup> Includes infections, preeclampsia/eclampsia, and proteinuria

<sup>f</sup> “No”: not working or mostly sitting and standing at work AND mostly sitting, walking, and standing in the home AND mostly inactive recreationally (less than the equivalent of walking half a mile a day); “Yes”: having a job that requires mostly walking or heavy labor OR mostly active housework or heavy manual work while at home OR recreationally active (equivalent to walking one or miles a day)

<sup>g</sup> “low activity”: no walking or regular exercise or the equivalent to walking a half a mile or less a day; “moderately active”: equivalent to walking about 1 mile every day; “high activity”: equivalent to walking 2 or more miles every day
